# Supplementary material
Source: PubMed Central journal article supplement (PMC6457115)
Supplement: NIHMS1511420-supplement-Sup_2.pdf [file NIHMS1511420-supplement-Sup_2.pdf]

1           Occupancy Modeling Species-Environment  
2           Relationships with Non-ignorable Survey Designs  
3                           *Ecological Applications*

4   Kathryn M. Irvine<sup>1,4</sup>, Thomas J. Rodhouse<sup>2</sup>, Wilson J. Wright<sup>1</sup>, &  
5                           Anthony R. Olsen<sup>3</sup>

6                   <sup>1</sup> U.S. Geological Survey, Northern Rocky Mountain Science Center,  
7                           Bozeman, MT 59715, USA

8                   <sup>2</sup> U.S. National Park Service, Upper Columbia Basin Network,  
9                           Bend, OR 97701, USA

10                  <sup>3</sup> U.S. Environmental Protection Agency, Western Ecology Division,  
11                           Corvallis, OR 97333, USA

12   <sup>4</sup>E-mail: kirvine@usgs.gov

### 13 **Appendix S1: Diagnostics for assessing ignorability of the survey design**

14 Here we present the mathematical details that underlie the recommendation that a comparison of  
15 the ML and P-ML estimates are an approach to assess whether a survey design is ignorable after  
16 fitting an occupancy model. The diagnostic is based on the independence condition  $w \perp\!\!\!\perp y | (\mathbf{X})$   
17 (Bollen et al. 2016). For each unit  $i$ , we represent whether it was included in the sample  $S$  by an  
18 indicator variable,  $I_i = 1$  if  $i \in S$ . Then a vector of indicator variables for all  $N$  sample units in  
19 the defined sample frame can be constructed. The independence condition holds if and only if the  
20 probability of sample unit  $i$  being in  $S$  is **not** related to the response  $y_i$  given a set of covariates  $x_i$ ,

$$Pr(I_i = 1 | y_i, x_i) = Pr(I_i = 1 | x_i) \quad \forall y_i. \quad (\text{Eq. S1})$$

21 When this independence relationship is true, the design is ignorable or non-informative (Pfeffer-  
22 mann 2011).

Following Pfeffermann (2007) and references therein, by definition the sample model accounts for the model parameters  $(p, \boldsymbol{\beta})$  and can be redefined based on the conditional probability density function (pdf) for  $y_i$  that includes the set of indicators that represent the design,

$$f_s(y_i | x_i; p, \boldsymbol{\beta}) \stackrel{\text{def.}}{=} f_s(y_i | x_i, I_i = 1; p, \boldsymbol{\beta}),$$

23 where  $f_s$  denotes the sample pdf. As shown in Pfeffermann (2011) by applying Bayes theorem

$$f_s(y_i | x_i, I_i = 1; p, \boldsymbol{\beta}, \boldsymbol{\gamma}) = \frac{Pr(I_i = 1 | x_i, y_i; \boldsymbol{\gamma}) f_p(y_i | x_i; p, \boldsymbol{\beta})}{Pr(I_i = 1 | x_i; p, \boldsymbol{\beta}, \boldsymbol{\gamma})} \quad (\text{Eq. S2})$$

24 where  $f_p(y_i | x_i; p, \boldsymbol{\beta})$  is the population pdf for  $i$  and  $\boldsymbol{\gamma}$  are the parameters related to the sample  
25 weights, if needed. Notice this shows the implicit assumption made with model-based inferences  
26 is that Eq. S1 is true, otherwise the sample and population pdfs in Eq. S2 will differ, i.e. the sample  
27 is not representative of the population. One pseudo-likelihood estimator is based on rewriting the

28 sample likelihood using the expectations of the sample weights

$$L_s(p, \beta, \gamma; \mathbf{y}_s, \mathbf{x}_s) = \prod_{i \in S} \frac{E_s(w_i | x_i; p, \beta, \gamma) f_p(y_i | x_i; p, \beta)}{E_s(w_i | y_i, x_i; \gamma)} \quad (\text{Eq. S3})$$

29 (Equation 3.19 in Pfeffermann 2011). Eq. S3 accounts for both the population values based on  
30 a model for the data-generating process and the sample selection process, but assumes that sample  
31 units are fixed (Pfefferman & Sverchkov 2003).

32 Formally, we used the estimating equation approach based on weighting the score functions  
33 to account for the mismatch between the census and sample score equations, as opposed to maxi-  
34 mizing Eq. S3. In our case, we approximated  $\frac{E_s(w_i | x_i; p, \beta, \gamma)}{E_s(w_i | y_i, x_i; \gamma)}$  by using the adjusted weights  $\tilde{w}_i$  and  
35 used these adjusted weights in the score equations based on the site-occupancy model (Equation  
36 2). More complicated procedures can be used for approximating these expectations based on the  
37 observed sample (Pfefferman & Sverchkov 2003; Pfeffermann 2011; Skinner & Mason 2012). Pre-  
38 vious work compared these two estimators (maximizing Eq. S3 versus Equation 2) and suggested  
39 that weighting the score function performed similarly (Pfefferman & Sverchkov 2003).

40 An alternative to a comparison of the confidence intervals from the P-ML and ML estimated  
41 models is the following:

- 42 1. fit the unweighted model with explanatory variables  $\mathbf{X}$ ,  $y \sim \mathbf{X}$ , and construct residuals,
- 43 2. plot the residuals from step 1 versus the sample weights.

44 If the plot and an appropriate correlation metric suggests there is no association between the residu-  
45 als and the sample weights, the design can be considered not informative or ignorable (e.g., Bollen  
46 et al. 2016). This approach should be similar to comparing the weighted (P-MLE) and unweighted  
47 estimates (MLE). We used the comparison of P-ML and ML estimates because constructing oc-  
48 cupancy model residuals for step 1 is not trivial at this point (Warton et al. 2017). For a more  
49 thorough review of the suggested diagnostic tests and relevant literature see Bollen et al. (2016).

## 50 Literature Cited

- 51 Bollen, K. A., P. P. Biemer, A. F. Karr, S. Tueller, & M. E. Berzofsky. 2016. Are survey weights needed? A  
52 review of diagnostic tests in regression analysis. *Annual Review of Statistics and Its Application*  
53 3:375–392.
- 54 Pfefferman, D. & M. Y. Sverchkov. 2003. “Fitting generalized linear models under informative sampling”.  
55 *Analysis of Survey Data*. Ed. by R. L. Chamber & C. J. Skinner. Chichester, West Sussex, England:  
56 Wiley. Chap. 12175–195.
- 57 Pfeffermann, D. 2007. Comment: Struggles with survey weighting and regression modeling. *Statistical*  
58 *Science* 22:179–183.
- 59 Pfeffermann, D. 2011. Modelling of complex survey data; Why model? Why is it a problem? How can we  
60 approach it? *Survey Methodology* 37:115–136.
- 61 Skinner, C. & B. Mason. 2012. Weighting in the regression analysis of survey data with a cross-national  
62 application. *The Canadian Journal of Statistics* 40:697–711.
- 63 Warton, D. I., J. Stoklosa, G. Guillera-Arroita, D. I. MacKenzie, & A. H. Welsh. 2017. Graphical  
64 diagnostics for occupancy models with imperfect detection. *Methods in Ecology and Evolution*  
65 8:408–419.
